# Supplementary material for: Two-Year Follow-Up Study of the Relationship Between Brain Structure and Cognitive Control Function Across the Adult Lifespan
Source: Front Aging Neurosci. 2021 Jun 1;13:655050. doi: 10.3389/fnagi.2021.655050 (PMC8205153; doi:10.3389/fnagi.2021.655050)
Supplement: Supplementary file 4 [file Table_4.docx]

Supplementary Table 4. Longitudinal correlation table (n = 102) using voxel-based morphometric (VBM) approach

|  |  | longitudinal ΔGMV correlation with | | | | |  | longitudinal ΔGMV correlation with | | | | | |
| --- | --- | --- | --- | --- | --- | --- | --- | --- | --- | --- | --- | --- | --- |
|  |  | age (tp1) | behaviorΔ(covariate: sex, edu, BDI-II) | | | |  | behaviorΔ (covariate: age, sex, edu, BDI-II) | | | | |
|  |  |  | speed | shifting | inhibition | memory |  | speed | shifting | inhibition | memory |
| dACC | rosAntCG_L | ns | ns | ns | ns | ns |  | ns | ns | ns | ns |
|  | rosAntCG_R | ns | ns | ns | ns | ns |  | ns | ns | ns | ns |
| DLPFC | infF-parOPC_L | ns | ns | ns | ns | ns |  | ns | ns | ns | ns |
|  | infF-parOPC_R | ns | ns | ns | ns | ns |  | ns | ns | ns | ns |
|  | rosMidF_L | ns | ns | ns | ns | ns |  | ns | ns | ns | ns |
|  | rosMidF_R | ns | ns | ns | ns | ns |  | ns | ns | ns | ns |
| DPC | infP_L | ns | ns | ns | ns | 0.199(1back) |  | ns | ns | ns | 0.201(1back) |
|  | infP_R | ns | ns | ns | ns | 0.204(1back) |  | ns | ns | ns | 0.207(1back) |
|  | supP_L | ns | ns | ns | ns | 0.211(1back) |  | ns | ns | ns | 0.213(1back) |
|  | supP_R | ns | ns | ns | ns | 0.218(1back) |  | ns | ns | ns | 0.220(1back) |
|  | precuneus_L | ns | ns | ns | ns | 0.210(1back) |  | ns | ns | ns | 0.212(1back) |
|  | precuneus_R | ns | ns | ns | ns | 0.214(1back) |  | ns | ns | ns | 0.216(1back) |

*p < 0.004 (Bonferroni corrected); GMV: gray matter volume; edu: education; L: left; R: right hemisphere; dACC : dorsal anterior cingulate cortex; rosAntCG : rostral anterior cingulate gyrus; DLPFC: dorsolateral prefrontal cortex; infF-parOPC: pars opercularis of the inferior frontal gyrus; rosMidF: rostral middle frontal gyrus; DPC: dorsal parietal cortex; infP: inferior parietal cortex (infP); supP: superior parietal cortex; TMT-A: Trail Making Test – Form A; GPT_L: Grooved Pegboard Test, left hand; GPT_R: Grooved Pegboard Test, right hand; TMT-B: Trail Making Test – Form B; SWI: switch cost in informative cue condition; noninfSWI: switch cost in non-informative cue condition; SSRT: Stop-signal reaction time; 2-back: 2-back task’s sensitivity; 1-back: 1-back task’s sensitivity
